# Supplementary material
Source: MDPI journal article supplement (https://www.mdpi.com/2227-9040/10/10/407)
Supplement: s1 [file s1 › chemosensors-1948579-supplementary.pdf]

## Supporting Information

# **An Ascorbic Acid-imprinted Poly(o-phenylenediamine)/AuNPs@COF<sub>TFPB-NBP</sub> DA for Electrochemical Sensing Ascorbic Acid**

Yaqin Chen, Xia Peng, Yonghai Song and Guangran Ma \*

National Engineering Research Center for Carbohydrate Synthesis/Key Lab of Fluorine and Silicon for Energy Materials and Chemistry of Ministry of Education, Analysis and Testing Center, College of Chemistry and Chemical Engineering, Jiangxi Normal University, 99 Ziyang Avenue, Nanchang 330022, China.

---

\* Correspondence: grma@jxnu.edu.cn or guangranma2008@163.com;

Tel/Fax: +86-791-88120861

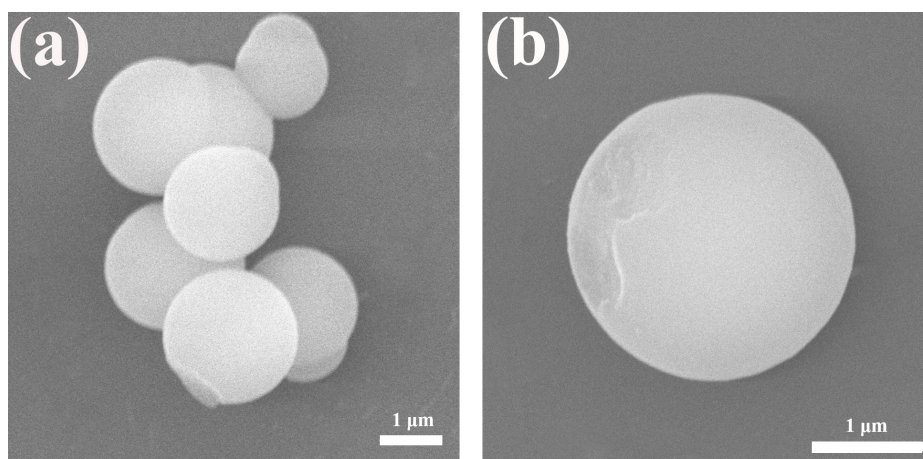

**Figure S1.** SEM image of COF<sub>TFPB-NBPDA</sub> under different magnification.

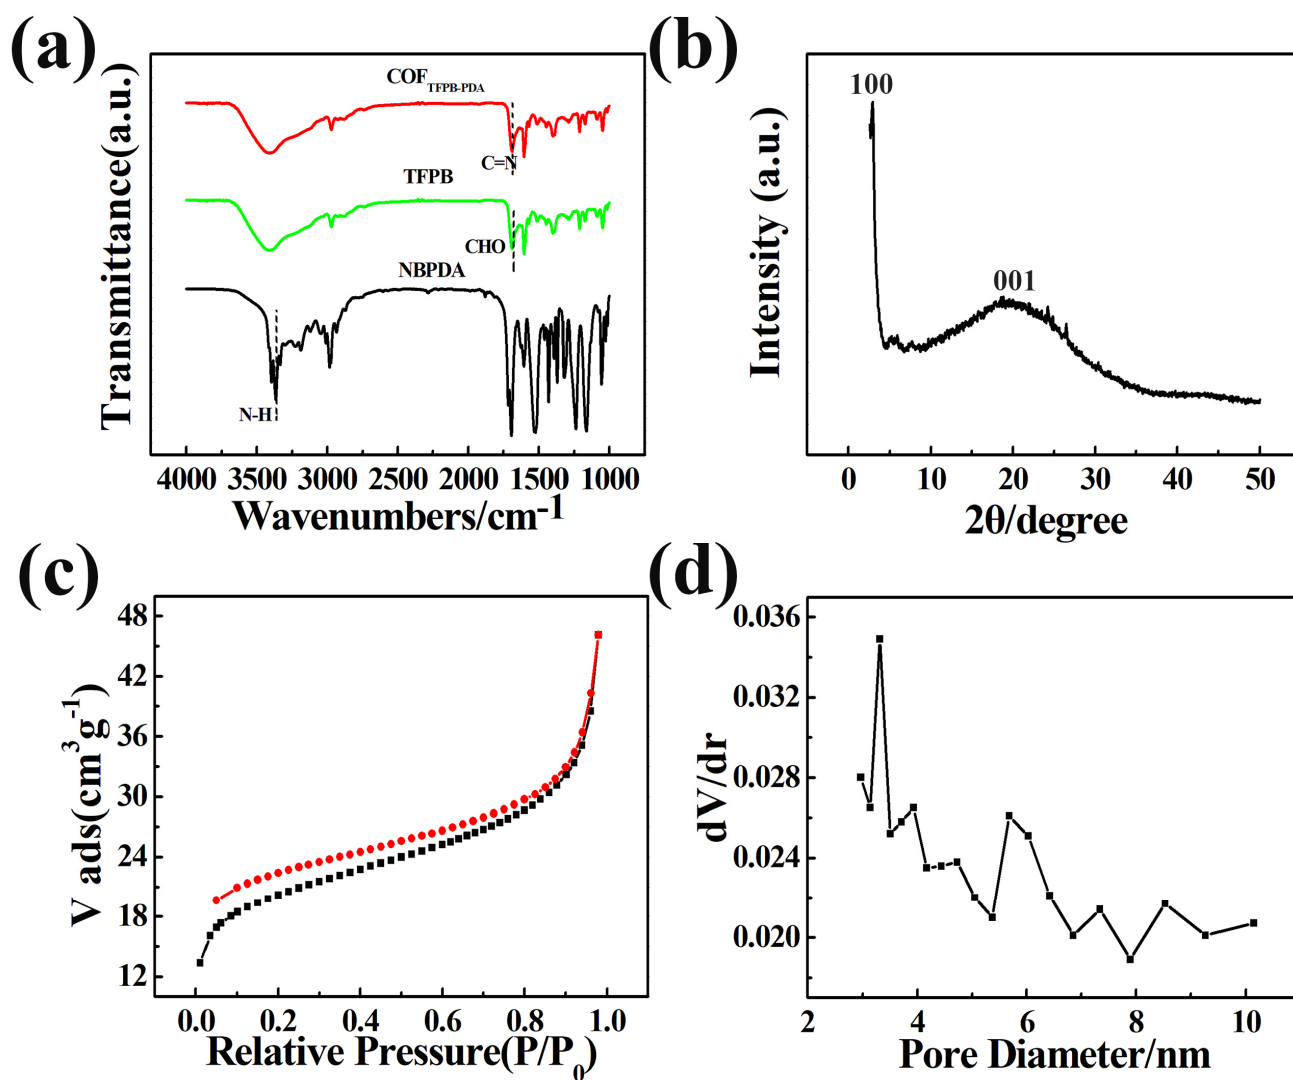

**Figure S2.** (a) FT-IR spectra of the COF<sub>TFPB-NBPDA</sub> (red line), TFPB (green line) and NBPDA (black line); (b) Wide-angle XRD pattern of COF<sub>TFPB-NBPDA</sub>; (c) N<sub>2</sub> adsorption-desorption isotherms of the COF<sub>TFPB-NBPDA</sub>; (d) COF<sub>TFPB-NBPDA</sub> pore size distributions.

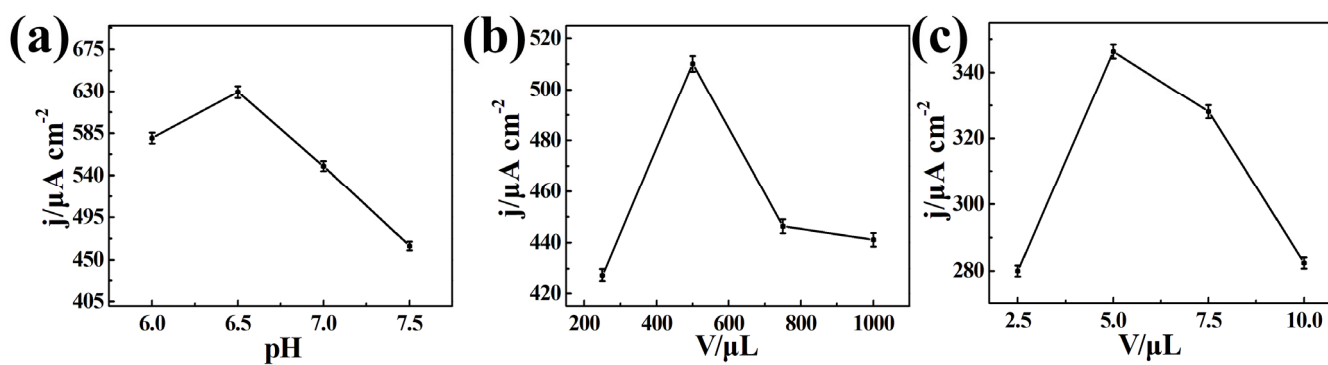

**Figure S3.** Effects of (a) pH of electrolyte solution, (b) volume of AuNPs solution, (c) volume of AuNPs@COF<sub>TFPB-NBPDA</sub> dispersion on electrode surface on the peak current density of AuNPs@COF<sub>TFPB-NBPDA</sub>/GCE for detection of AA.

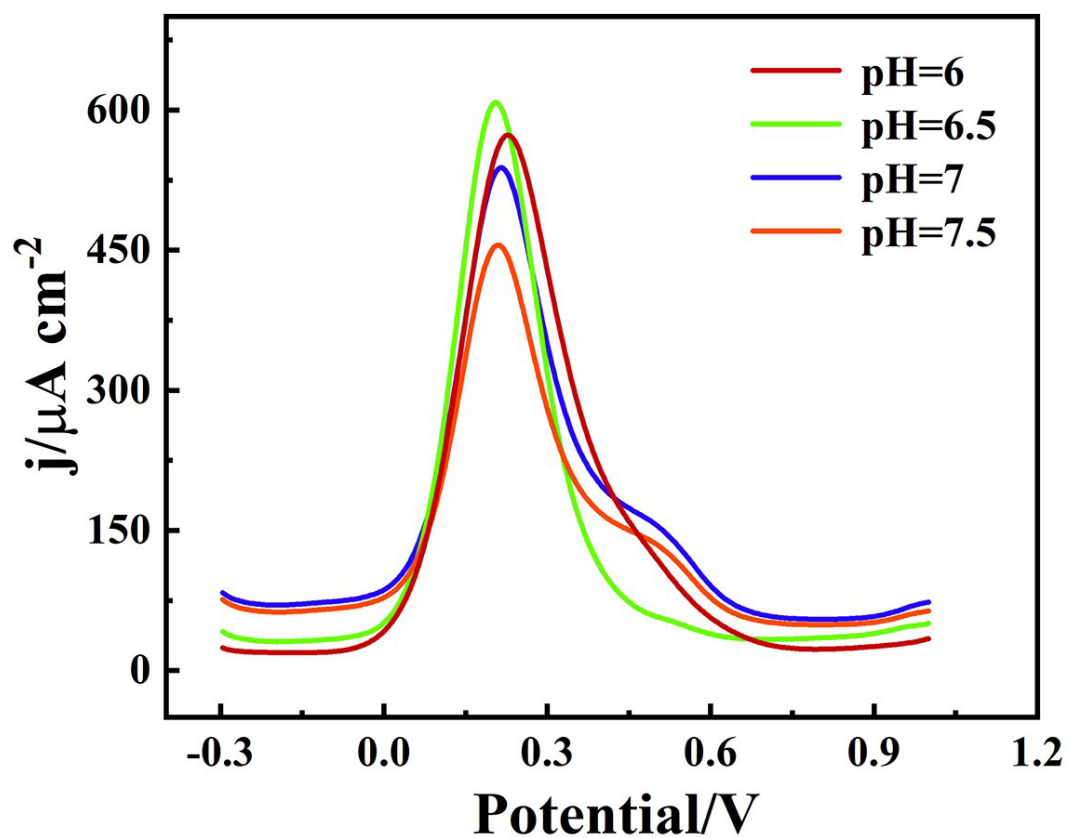

**Figure S4.** DPV of AuNPs@COFTFPB-NBPDA/GCE in 0.2 M phosphate buffered solution different pH in the presence of 30 mM AA.

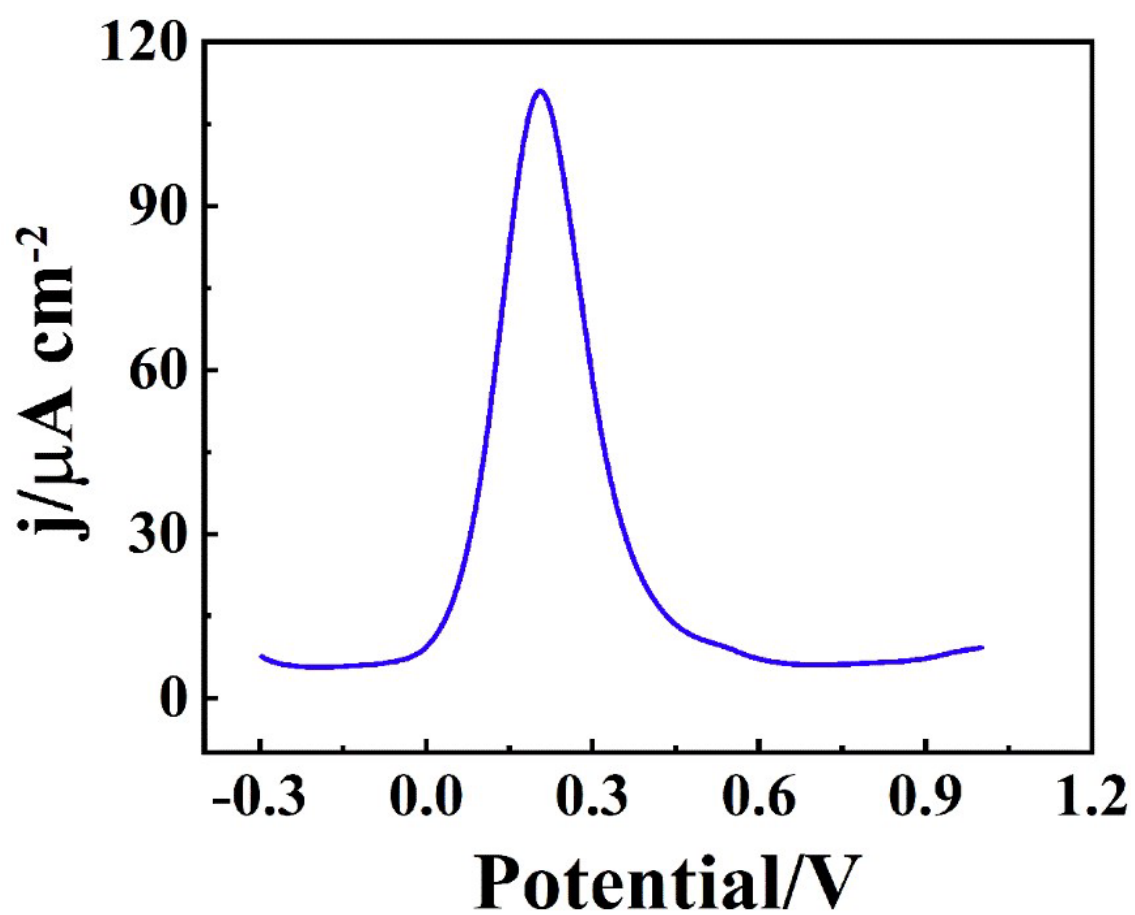

**Figure S5.** DPV of MIP/AuNPs@COFTFPB-NBPDA/GCE in 0.2 M phosphate buffered solution (pH=6.5).

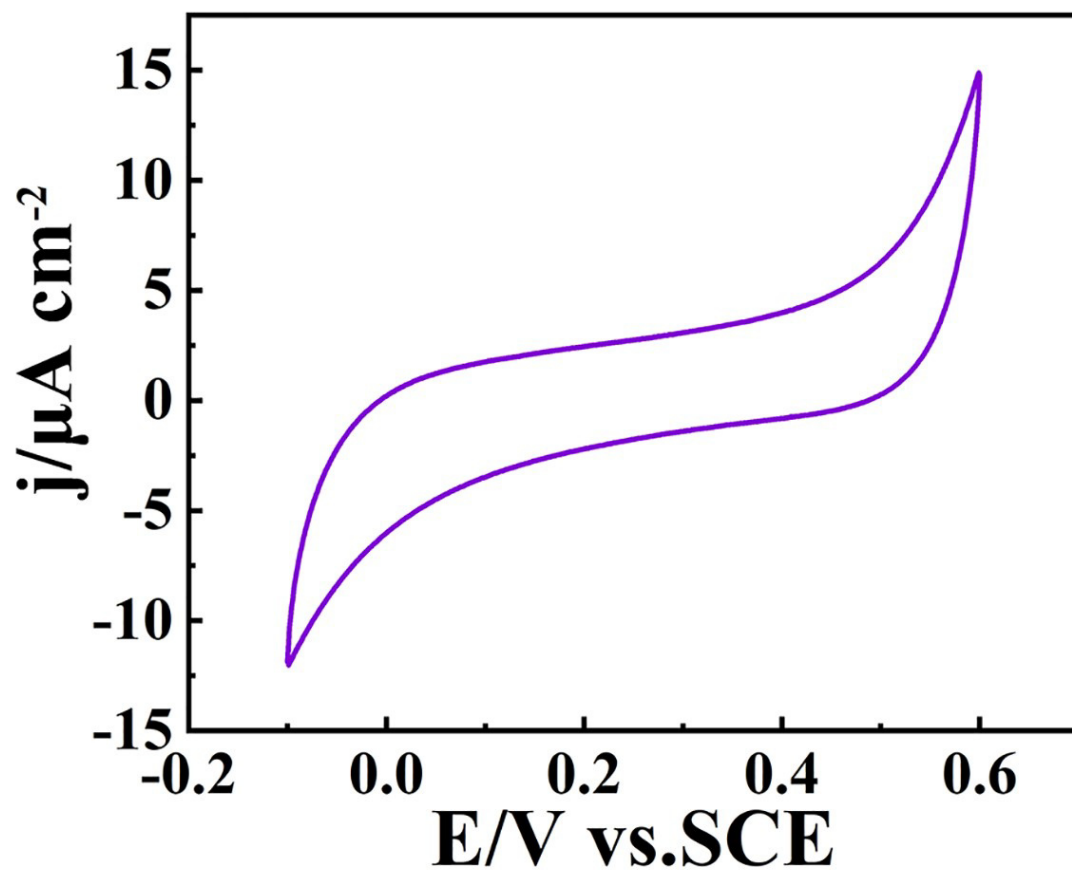

**Figure S6.** CVs of NIP/AuNPs@COFTFPB-NBPDA/GCE in 5 mM  $\text{K}_3[\text{Fe}(\text{CN})_6]$  with 0.1 M KCl.

**Table S1.** Performance comparison of different AA electrochemical sensors.

| Electrode                                 | LOD ( $\mu\text{M}$ ) | Linear range<br>( $\mu\text{M}$ ) | References |
|-------------------------------------------|-----------------------|-----------------------------------|------------|
| MVCM                                      | 3.57                  | 20-500                            | [45]       |
| Ni <sub>3</sub> (HITP) <sub>2</sub> /SPCE | 1                     | 2-200                             | [46]       |
| S-fs-ERG                                  | 2.5                   | 2.5-1000                          | [47]       |
| NOCC-O                                    | 3.41                  | 10-1300                           | [48]       |
| ZIF-8/PtNPs/GCE                           | 5.2                   | 10-2500                           | [34]       |
| ZnHCFSSQ-H/GPE                            | 67                    | 0.9-900                           | [49]       |
| film-1/ITO                                | 3.7                   | 10-1000                           | [50]       |
| rGO-AuNPs                                 | 5.63                  | 20-150                            | [51]       |
| GO/NNO <sub>100</sub>                     | 3.8                   | 300-1100                          | [52]       |
| CuO                                       | 1.97                  | 10-150                            | [53]       |
| AuNPs@COF <sub>TFPB-NBPDA</sub> /GCE      | 1.69                  | 5.07-60000                        | This work  |
| nMIP/AuNPs@COF <sub>TFPB-NBPDA</sub> /GCE | 0.17                  | 0.51-60000                        | This work  |

**Table S2.** Detection of AA in effervescent tablets by nMIP/AuNPs@COF<sub>TFPB-NBPDA</sub>/GCE in 0.2 M PBS (pH=6.5).

| Sample | Added ( $\mu\text{M}$ ) | Founded ( $\mu\text{M}$ ) | Average<br>value ( $\mu\text{M}$ ) | Recovery (%) | RSD (% , n=3) |
|--------|-------------------------|---------------------------|------------------------------------|--------------|---------------|
| 1      | 5                       | 4.94, 5.08, 4.89          | 4.97                               | 99.4         | 6.3           |
| 2      | 10                      | 10.15, 10.13, 9.98        | 10.08                              | 100.8        | 0.9           |
| 3      | 20                      | 19.97, 20.07, 20.03       | 20.02                              | 100.1        | 0.8           |
